# Supplementary material for: Temporal trends and determinants of COVID-19 vaccine series initiation after recent pregnancy
Source: PubMed Central journal article supplement — Hum Vaccin Immunother. 2023 May 30;19(2):2215150. doi: 10.1080/21645515.2023.2215150 (PMC10305504; doi:10.1080/21645515.2023.2215150), 2023-05-30
Supplement: KHVI_A_2215150_SM9369.pdf [file KHVI_A_2215150_SM9369.pdf]

**Table S1. Data sources and variables**

| Data source                                                                                               | Description                                                                                                                                                                                                                                                                                                                                                                                                                                                                                                                                                                                                                                                                                                                                                                                                                                                                                                                                                                                                                                                                                                                                                                                                                                                                                                                                                                                                                                                                                                                                                                                                                                                                                                                                                                                                                                                                                                                                                                                                                               | Variables                                                                                                                                                                                                                                                                                                                                                                                                                                                                                                                                                                                                                                                                                                                                                                                                                                                                                                                                                                                                                                                                                                                                                                                                                                                 |
|-----------------------------------------------------------------------------------------------------------|-------------------------------------------------------------------------------------------------------------------------------------------------------------------------------------------------------------------------------------------------------------------------------------------------------------------------------------------------------------------------------------------------------------------------------------------------------------------------------------------------------------------------------------------------------------------------------------------------------------------------------------------------------------------------------------------------------------------------------------------------------------------------------------------------------------------------------------------------------------------------------------------------------------------------------------------------------------------------------------------------------------------------------------------------------------------------------------------------------------------------------------------------------------------------------------------------------------------------------------------------------------------------------------------------------------------------------------------------------------------------------------------------------------------------------------------------------------------------------------------------------------------------------------------------------------------------------------------------------------------------------------------------------------------------------------------------------------------------------------------------------------------------------------------------------------------------------------------------------------------------------------------------------------------------------------------------------------------------------------------------------------------------------------------|-----------------------------------------------------------------------------------------------------------------------------------------------------------------------------------------------------------------------------------------------------------------------------------------------------------------------------------------------------------------------------------------------------------------------------------------------------------------------------------------------------------------------------------------------------------------------------------------------------------------------------------------------------------------------------------------------------------------------------------------------------------------------------------------------------------------------------------------------------------------------------------------------------------------------------------------------------------------------------------------------------------------------------------------------------------------------------------------------------------------------------------------------------------------------------------------------------------------------------------------------------------|
| <p><b>BORN Ontario birth registry</b><br/> <a href="http://www.bornontario.ca">www.bornontario.ca</a></p> | <p>The birth registry captures information on all Ontario births ≥20 weeks' gestation (all hospital births and the ~2.8% of home births with a midwife<sup>1</sup>) from over 250 hospitals, birth centers, midwifery practice groups, and prenatal screening labs.<sup>2</sup> Prenatal and maternity care are publicly funded in the province.</p> <p>Records for pregnant individuals who undergo prenatal screening (about 70% in Ontario<sup>3</sup>) are uploaded weekly to the registry from hospital- and community-based labs and ultrasound clinics. Thus, screened pregnancies are identifiable in the registry as early as 10 weeks' gestation; 97% of prenatal screening records are linked with other health care encounters pertaining to birth. Unscreened pregnancies typically become identifiable in the BIS only at the time of the birth.</p> <p>When a pregnant individual presents to care around the time of birth, the registry generates a “Labor and birth encounter” that captures information about labor and birth through to the first hour postpartum, regardless of birth setting (hospital, home, or birth center). A separate “Birth-child encounter” documents information about each newborn (live births and stillbirths) through to the first hour postpartum. Postpartum encounters capture clinical information about the mother and newborn(s) from the immediate postpartum period until discharge from hospital/birth center. Unique identifiers (mother and newborn), assigned upon first record entry into the registry, are used by the system to deterministically link all encounters through a robust automated algorithm. A system-generated signal indicates when each encounter record is complete. Submitting sites are required to perform monthly automated data validation checks that flag records with missing encounters or data errors so that corrections can be made; every month, each site must report that it has reviewed and resolved flagged errors.<sup>2</sup></p> | <ul style="list-style-type: none"> <li>• Estimated date of birth</li> <li>• Date of birth</li> <li>• Unique health card number</li> <li>• Postal code <sup>a</sup></li> <li>• Public health unit region of residence <sup>b</sup></li> <li>• Maternal age at birth (years)</li> <li>• Pre-pregnancy body mass index (kilograms/metre<sup>2</sup> [kg/m<sup>2</sup>])</li> <li>• Self-reported smoking during pregnancy</li> <li>• Self-reported substance use during pregnancy (cannabis, opioid or alcohol use during pregnancy)</li> <li>• Public health unit region</li> <li>• Pre-existing maternal health conditions (asthma, chronic hypertension, diabetes, heart disease, thyroid disease)</li> <li>• Parity</li> <li>• Multiple birth</li> <li>• Labor and birth complications (gestational hypertension, preeclampsia/eclampsia, gestational diabetes, pulmonary embolism)</li> <li>• Newborn feeding from birth to discharge from hospital or birth center (exclusive breastfeeding vs. other feeding [breast milk substitute (formula only), breastmilk substitute (other), combination of breastmilk and breastmilk substitute, and unknown feeding practices])</li> <li>• Healthcare provider who caught/delivered baby (midwife</li> </ul> |

|                                      |                                                                                                                                                                                                                                                                                                                                                                                                                                                                                                                                                                                                                                                                                                                                                                                                                                                                                                                                                                                                                                                                                                                                                                                          |                                                                                                                                                                                                                                                                                                                                                                                                             |
|--------------------------------------|------------------------------------------------------------------------------------------------------------------------------------------------------------------------------------------------------------------------------------------------------------------------------------------------------------------------------------------------------------------------------------------------------------------------------------------------------------------------------------------------------------------------------------------------------------------------------------------------------------------------------------------------------------------------------------------------------------------------------------------------------------------------------------------------------------------------------------------------------------------------------------------------------------------------------------------------------------------------------------------------------------------------------------------------------------------------------------------------------------------------------------------------------------------------------------------|-------------------------------------------------------------------------------------------------------------------------------------------------------------------------------------------------------------------------------------------------------------------------------------------------------------------------------------------------------------------------------------------------------------|
|                                      |                                                                                                                                                                                                                                                                                                                                                                                                                                                                                                                                                                                                                                                                                                                                                                                                                                                                                                                                                                                                                                                                                                                                                                                          | <p>[aboriginal midwife, midwife at birth center, midwife at home, midwife at hospital, midwifery student, registered midwife], registered nurse or clinical nurse specialist/nurse practitioner, family physician, obstetrician, other [other healthcare provider, resident, surgeon], unattended)</p> <ul style="list-style-type: none"> <li>• First prenatal care visit in the first trimester</li> </ul> |
| <b>COVaxON</b>                       | <p>COVaxON, Ontario’s COVID-19 immunization database, contains records for all COVID-19 vaccines administered in the province. Data are reported into COVaxON at the time of immunization, regardless of type of provider or delivery location (mass immunization clinic, pharmacy, etc.). Information includes vaccine product, dose number, and date(s) of vaccination. We linked the study population to the COVaxON database based on maternal unique health care number.</p>                                                                                                                                                                                                                                                                                                                                                                                                                                                                                                                                                                                                                                                                                                        | <ul style="list-style-type: none"> <li>• Number of doses</li> <li>• Date(s) of vaccination</li> <li>• Vaccine product received for each dose</li> </ul>                                                                                                                                                                                                                                                     |
| <b>Canadian Census</b>               | <p>To obtain information on rural/urban residence and neighborhood income quintile, we linked the study population to Statistics Canada’s 2016 Census based on maternal postal code.</p>                                                                                                                                                                                                                                                                                                                                                                                                                                                                                                                                                                                                                                                                                                                                                                                                                                                                                                                                                                                                 | <ul style="list-style-type: none"> <li>• Rural/urban residence</li> <li>• Neighborhood income quintile</li> </ul>                                                                                                                                                                                                                                                                                           |
| <b>Ontario Marginalization Index</b> | <p>We linked the study population to the Ontario Marginalization (ON-Marg) Index based on maternal postal code. Data from Statistics Canada’s Census are used to derive the ON-Marg Index.<sup>4</sup> The index quantifies the level of marginalization across the province and consists of four dimensions: residential instability, material deprivation, dependency, and ethnic concentration. Area-based quintile scores are available for each dimension, with quintile one representing the least marginalized areas, and quintile five, the most marginalized.</p> <p>Residential instability identifies areas with high rates of family or housing instability. This dimension is closely connected to neighborhood quality and is derived using seven Census indicators: 1) percentage of population living alone; 2) percentage of population who are not youth aged 5-15 years; 3) average number of persons per dwelling; 4) percentage of dwellings that are in apartment buildings; 5) percentage of population who are single/divorced/widowed; 6) percentage of dwellings that are not owned; and 7) percentage of population who moved during the past five years.</p> | <ul style="list-style-type: none"> <li>• Residential instability</li> <li>• Material deprivation</li> <li>• Dependency</li> <li>• Ethnic concentration</li> </ul>                                                                                                                                                                                                                                           |

|  |                                                                                                                                                                                                                                                                                                                                                                                                                                                                                                                                                                                                                                                                                                                                                                                                                                                                                                                                                                                                                                                                                                                                                                                                                                                                                                                                                                                                                                                                                                                                                                                                                                                                                                                                                                                                                                                                                     |  |
|--|-------------------------------------------------------------------------------------------------------------------------------------------------------------------------------------------------------------------------------------------------------------------------------------------------------------------------------------------------------------------------------------------------------------------------------------------------------------------------------------------------------------------------------------------------------------------------------------------------------------------------------------------------------------------------------------------------------------------------------------------------------------------------------------------------------------------------------------------------------------------------------------------------------------------------------------------------------------------------------------------------------------------------------------------------------------------------------------------------------------------------------------------------------------------------------------------------------------------------------------------------------------------------------------------------------------------------------------------------------------------------------------------------------------------------------------------------------------------------------------------------------------------------------------------------------------------------------------------------------------------------------------------------------------------------------------------------------------------------------------------------------------------------------------------------------------------------------------------------------------------------------------|--|
|  | <p>Material deprivation identifies individuals and communities unable to access and attain basic material needs. This dimension is closely connected to poverty and is derived from six Census indicators of income, housing quality, educational attainment, and familial structure: 1) percentage of population <math>\geq 20</math> years without a secondary diploma; 2) percentage of lone-parent families; 3) percentage of total income received from government transfer payments for population aged <math>\geq 15</math> years; 4) percentage of population aged <math>\geq 15</math> years who are unemployed; 5) percentage of population considered low-income; and 6) percentage of household dwellings in need of major repair.</p> <p>Dependency identifies areas with high concentrations of residents who do not receive employment income and are compensated for their work. The Census indicators used to derive dependency are: 1) percentage of population who are aged <math>\geq 65</math> years; 2) dependency ratio (total population aged 0-14 years and <math>\geq 65</math> years / total population aged 15 to 64 years); and 3) percentage of population aged <math>\geq 15</math> years not participating in labor force.</p> <p>Ethnic concentration identifies areas with high concentrations of recent immigrants and/or “visible minorities” (defined by Statistics Canada as “persons, other than Aboriginal peoples, who are non-Caucasian in race or non-white in color”). This dimension is derived from two Census indicators: 1) percentage of population who are recent immigrants (arrived in past five years); and 2) percentage of population who self-identify as a visible minority (Census respondents can indicate more than one race/ethnicity from a list, or can specify a group not listed on the Census questionnaire).</p> |  |
|--|-------------------------------------------------------------------------------------------------------------------------------------------------------------------------------------------------------------------------------------------------------------------------------------------------------------------------------------------------------------------------------------------------------------------------------------------------------------------------------------------------------------------------------------------------------------------------------------------------------------------------------------------------------------------------------------------------------------------------------------------------------------------------------------------------------------------------------------------------------------------------------------------------------------------------------------------------------------------------------------------------------------------------------------------------------------------------------------------------------------------------------------------------------------------------------------------------------------------------------------------------------------------------------------------------------------------------------------------------------------------------------------------------------------------------------------------------------------------------------------------------------------------------------------------------------------------------------------------------------------------------------------------------------------------------------------------------------------------------------------------------------------------------------------------------------------------------------------------------------------------------------------|--|

<sup>a</sup> Residential postal codes on all records from the birth registry were used to link the study population to area-based socioeconomic information from Statistics Canada’s 2016 Census and the Ontario Marginalization Index.

<sup>b</sup> South West: Chatham-Kent Health Unit; Grey Bruce Health Unit; Huron County Health Unit; Perth District Health Unit; Lambton Health Unit; Middlesex-London Health Unit; Windsor-Essex County Health Unit; Oxford Elgin St. Thomas Health Unit. Central West: Brant County Health Unit; City of Hamilton Health Unit; Haldimand-Norfolk Health Unit; Halton Regional Health Unit; Niagara Regional Area Health Unit; Waterloo Health Unit; Wellington-Dufferin-Guelph Health Unit. Central East: Durham Regional Health Unit; Haliburton, Kawartha, Pine Ridge District Health Unit; Peel Regional Health Unit; Peterborough County–City Health Unit; Simcoe Muskoka District Health Unit; York Regional Health Unit. Greater Toronto Area: City of Toronto Health Unit. Eastern: The Eastern Ontario Health Unit; Hastings and Prince Edward Counties Health Unit; Kingston, Frontenac and Lennox and Addington Health Unit; Leeds, Grenville and Lanark District Health Unit; City of Ottawa Health Unit; Renfrew County and District Health Unit. North West: Northwestern Health Unit; Thunder Bay

District Health Unit. North East: The District of Algoma Health Unit; North Bay Parry Sound District Health Unit; Porcupine Health Unit; Sudbury and District Health Unit; Timiskaming Health Unit.

**Table S2. Crude and imputed frequencies of baseline characteristics for variables with missing information from January 1 to December 31, 2021**

| Characteristic                                          | Non-imputed dataset<br>n=87,376 |                | Imputation dataset #1<br>n=87,376 |                | Imputation dataset #2<br>n=87,376 |                | Imputation dataset #3<br>n=87,376 |                | Imputation dataset #4<br>n=87,376 |                | Imputation dataset #5<br>n=87,376 |                |
|---------------------------------------------------------|---------------------------------|----------------|-----------------------------------|----------------|-----------------------------------|----------------|-----------------------------------|----------------|-----------------------------------|----------------|-----------------------------------|----------------|
|                                                         | No.                             | % <sup>a</sup> | No.                               | % <sup>a</sup> | No.                               | % <sup>a</sup> | No.                               | % <sup>a</sup> | No.                               | % <sup>a</sup> | No.                               | % <sup>a</sup> |
| <b>Parity</b>                                           |                                 |                |                                   |                |                                   |                |                                   |                |                                   |                |                                   |                |
| 0 (nulliparous)                                         | 37,049                          | 42.4           | 37,189                            | 42.6           | 37,201                            | 42.6           | 37,194                            | 42.6           | 37,164                            | 42.5           | 37,194                            | 42.6           |
| 1 (primiparous)                                         | 29,422                          | 33.7           | 29,536                            | 33.8           | 29,539                            | 33.8           | 29,532                            | 33.8           | 29,544                            | 33.8           | 29,525                            | 33.8           |
| ≥2 (multiparous)                                        | 20,560                          | 23.5           | 20,651                            | 23.6           | 20,636                            | 23.6           | 20,650                            | 23.6           | 20,668                            | 23.7           | 20,657                            | 23.6           |
| Missing                                                 | 345                             | 0.4            | -                                 | -              | -                                 | -              | -                                 | -              | -                                 | -              | -                                 | -              |
| <b>Exclusive breastfeeding at discharge<sup>b</sup></b> |                                 |                |                                   |                |                                   |                |                                   |                |                                   |                |                                   |                |
| No                                                      | 35,804                          | 41.0           | 42,318                            | 48.4           | 42,377                            | 48.5           | 42,342                            | 48.5           | 42,330                            | 48.5           | 42,263                            | 48.4           |
| Yes                                                     | 37,904                          | 43.4           | 45,058                            | 51.6           | 44,999                            | 51.5           | 45,034                            | 51.5           | 45,046                            | 51.6           | 45,113                            | 51.6           |
| Missing                                                 | 13,668                          | 15.6           | -                                 | -              | -                                 | -              | -                                 | -              | -                                 | -              | -                                 | -              |
| <b>Healthcare provider who caught/delivered baby</b>    |                                 |                |                                   |                |                                   |                |                                   |                |                                   |                |                                   |                |
| Midwife                                                 | 10,608                          | 12.1           | 10,714                            | 12.3           | 10,701                            | 12.3           | 10,702                            | 12.3           | 10,707                            | 12.3           | 10,707                            | 12.3           |
| Registered Nurse or CNS/NP                              | 657                             | 0.8            | 658                               | 0.8            | 664                               | 0.8            | 660                               | 0.8            | 665                               | 0.8            | 664                               | 0.8            |
| Family Physician                                        | 4,967                           | 5.7            | 5,021                             | 5.8            | 5,014                             | 5.7            | 5,021                             | 5.8            | 5,020                             | 5.8            | 5,019                             | 5.7            |
| Obstetrician                                            | 62,927                          | 72.0           | 63,438                            | 72.6           | 63,457                            | 72.6           | 63,455                            | 72.6           | 63,449                            | 72.6           | 63,454                            | 72.6           |
| Other                                                   | 7,145                           | 8.2            | 7,212                             | 8.3            | 7,202                             | 8.2            | 7,206                             | 8.3            | 7,202                             | 8.2            | 7,197                             | 8.2            |
| Unattended (None)                                       | 332                             | 0.4            | 333                               | 0.4            | 338                               | 0.4            | 332                               | 0.4            | 333                               | 0.4            | 335                               | 0.4            |
| Missing                                                 | 740                             | 0.9            | -                                 | -              | -                                 | -              | -                                 | -              | -                                 | -              | -                                 | -              |
| <b>Smoked during pregnancy</b>                          |                                 |                |                                   |                |                                   |                |                                   |                |                                   |                |                                   |                |
| No                                                      | 78,981                          | 90.4           | 80,449                            | 92.1           | 80,437                            | 92.1           | 80,449                            | 92.1           | 80,432                            | 92.1           | 80,424                            | 92.0           |
| Yes                                                     | 6,720                           | 7.7            | 6,927                             | 7.9            | 6,939                             | 7.9            | 6,927                             | 7.9            | 6,944                             | 8.0            | 6,952                             | 8.0            |
| Missing                                                 | 1,675                           | 1.9            | -                                 | -              | -                                 | -              | -                                 | -              | -                                 | -              | -                                 | -              |
| <b>Substance use during pregnancy<sup>c</sup></b>       |                                 |                |                                   |                |                                   |                |                                   |                |                                   |                |                                   |                |
| No                                                      | 78,456                          | 89.8           | 82,104                            | 94.0           | 82,097                            | 94.0           | 82,095                            | 94.0           | 82,082                            | 93.9           | 82,073                            | 93.9           |
| Yes                                                     | 4,935                           | 5.7            | 5,272                             | 6.0            | 5,279                             | 6.0            | 5,281                             | 6.0            | 5,294                             | 6.1            | 5,303                             | 6.1            |

|                                                    |        |      |        |      |        |      |        |      |        |      |        |      |
|----------------------------------------------------|--------|------|--------|------|--------|------|--------|------|--------|------|--------|------|
| Missing                                            | 3,985  | 4.6  | -      | -    | -      | -    | -      | -    | -      | -    | -      | -    |
| <b>Maternal body mass index (kg/m<sup>2</sup>)</b> |        |      |        |      |        |      |        |      |        |      |        |      |
| ≥30.0 (obese)                                      | 61,544 | 70.4 | 69,203 | 79.2 | 69,299 | 79.3 | 69,221 | 79.2 | 69,187 | 79.2 | 69,291 | 79.3 |
| <30.0                                              | 16,158 | 18.5 | 18,173 | 20.8 | 18,077 | 20.7 | 18,155 | 20.8 | 18,189 | 20.8 | 18,085 | 20.7 |
| Missing                                            | 9,674  | 11.1 | -      | -    | -      | -    | -      | -    | -      | -    | -      | -    |
| <b>Neighborhood median family income quintiles</b> |        |      |        |      |        |      |        |      |        |      |        |      |
| 1 (Lowest)                                         | 19,323 | 22.1 | 19,569 | 22.4 | 19,547 | 22.4 | 19,554 | 22.4 | 19,576 | 22.4 | 19,550 | 22.4 |
| 2                                                  | 17,949 | 20.5 | 18,171 | 20.8 | 18,193 | 20.8 | 18,174 | 20.8 | 18,178 | 20.8 | 18,185 | 20.8 |
| 3                                                  | 18,501 | 21.2 | 18,717 | 21.4 | 18,698 | 21.4 | 18,716 | 21.4 | 18,706 | 21.4 | 18,713 | 21.4 |
| 4                                                  | 17,344 | 19.9 | 17,524 | 20.1 | 17,532 | 20.1 | 17,532 | 20.1 | 17,510 | 20.0 | 17,535 | 20.1 |
| 5 (Highest)                                        | 13,264 | 15.2 | 13,395 | 15.3 | 13,406 | 15.3 | 13,400 | 15.3 | 13,406 | 15.3 | 13,393 | 15.3 |
| Missing                                            | 995    | 1.1  | -      | -    | -      | -    | -      | -    | -      | -    | -      | -    |
| <b>Rural residence</b>                             |        |      |        |      |        |      |        |      |        |      |        |      |
| No                                                 | 73,573 | 84.2 | 73,947 | 84.6 | 73,939 | 84.6 | 73,949 | 84.6 | 73,949 | 84.6 | 73,955 | 84.6 |
| Yes                                                | 13,361 | 15.3 | 13,429 | 15.4 | 13,437 | 15.4 | 13,427 | 15.4 | 13,427 | 15.4 | 13,421 | 15.4 |
| Missing                                            | 442    | 0.5  | -      | -    | -      | -    | -      | -    | -      | -    | -      | -    |
| <b>Public health unit region of residence</b>      |        |      |        |      |        |      |        |      |        |      |        |      |
| South West                                         | 11,560 | 13.2 | 11,695 | 13.4 | 11,691 | 13.4 | 11,707 | 13.4 | 11,692 | 13.4 | 11,686 | 13.4 |
| Central West                                       | 18,188 | 20.8 | 18,422 | 21.1 | 18,423 | 21.1 | 18,387 | 21.0 | 18,429 | 21.1 | 18,420 | 21.1 |
| Central East                                       | 25,612 | 29.3 | 25,919 | 29.7 | 25,905 | 29.7 | 25,906 | 29.7 | 25,918 | 29.7 | 25,907 | 29.7 |
| Greater Toronto Area                               | 15,601 | 17.9 | 15,766 | 18.0 | 15,771 | 18.1 | 15,787 | 18.1 | 15,776 | 18.1 | 15,771 | 18.1 |
| Eastern                                            | 10,646 | 12.2 | 10,753 | 12.3 | 10,760 | 12.3 | 10,756 | 12.3 | 10,748 | 12.3 | 10,767 | 12.3 |
| North West                                         | 1,560  | 1.8  | 1,576  | 1.8  | 1,575  | 1.8  | 1,579  | 1.8  | 1,569  | 1.8  | 1,580  | 1.8  |
| North East                                         | 3,214  | 3.7  | 3,245  | 3.7  | 3,251  | 3.7  | 3,254  | 3.7  | 3,244  | 3.7  | 3,245  | 3.7  |
| Missing                                            | 995    | 1.1  | -      | -    | -      | -    | -      | -    | -      | -    | -      | -    |
| <b>Marginalization indices</b>                     |        |      |        |      |        |      |        |      |        |      |        |      |
| <b>Residential instability quintile</b>            |        |      |        |      |        |      |        |      |        |      |        |      |
| 1 (least unstable)                                 | 17,407 | 19.9 | 17,701 | 20.3 | 17,685 | 20.2 | 17,710 | 20.3 | 17,677 | 20.2 | 17,695 | 20.3 |
| 2                                                  | 16,327 | 18.7 | 16,607 | 19.0 | 16,607 | 19.0 | 16,593 | 19.0 | 16,584 | 19.0 | 16,615 | 19.0 |
| 3                                                  | 16,263 | 18.6 | 16,555 | 19.0 | 16,588 | 19.0 | 16,561 | 19.0 | 16,604 | 19.0 | 16,578 | 19.0 |
| 4                                                  | 16,005 | 18.3 | 16,382 | 18.8 | 16,391 | 18.8 | 16,396 | 18.8 | 16,383 | 18.8 | 16,364 | 18.7 |
| 5 (most unstable)                                  | 19,551 | 22.4 | 20,131 | 23.0 | 20,105 | 23.0 | 20,116 | 23.0 | 20,128 | 23.0 | 20,124 | 23.0 |

|                                      |        |      |        |      |        |      |        |      |        |      |        |      |
|--------------------------------------|--------|------|--------|------|--------|------|--------|------|--------|------|--------|------|
| Missing                              | 1,823  | 2.1  | -      | -    | -      | -    | -      | -    | -      | -    | -      | -    |
| <b>Material deprivation quintile</b> |        |      |        |      |        |      |        |      |        |      |        |      |
| 1 (least deprived)                   | 17,369 | 19.9 | 17,610 | 20.2 | 17,625 | 20.2 | 17,613 | 20.2 | 17,626 | 20.2 | 17,609 | 20.2 |
| 2                                    | 16,652 | 19.1 | 16,924 | 19.4 | 16,903 | 19.4 | 16,915 | 19.4 | 16,925 | 19.4 | 16,904 | 19.4 |
| 3                                    | 16,158 | 18.5 | 16,393 | 18.8 | 16,424 | 18.8 | 16,434 | 18.8 | 16,417 | 18.8 | 16,446 | 18.8 |
| 4                                    | 16,266 | 18.6 | 16,588 | 19.0 | 16,592 | 19.0 | 16,576 | 19.0 | 16,569 | 19.0 | 16,566 | 19.0 |
| 5 (most deprived)                    | 19,108 | 21.9 | 19,861 | 22.7 | 19,832 | 22.7 | 19,838 | 22.7 | 19,839 | 22.7 | 19,851 | 22.7 |
| Missing                              | 1,823  | 2.1  | -      | -    | -      | -    | -      | -    | -      | -    | -      | -    |
| <b>Dependency quintile</b>           |        |      |        |      |        |      |        |      |        |      |        |      |
| 1 (least dependent)                  | 27,516 | 31.5 | 27,931 | 32.0 | 27,937 | 32.0 | 27,983 | 32.0 | 27,928 | 32.0 | 27,944 | 32.0 |
| 2                                    | 17,944 | 20.5 | 18,271 | 20.9 | 18,304 | 21.0 | 18,293 | 20.9 | 18,318 | 21.0 | 18,315 | 21.0 |
| 3                                    | 14,517 | 16.6 | 14,848 | 17.0 | 14,817 | 17.0 | 14,825 | 17.0 | 14,838 | 17.0 | 14,844 | 17.0 |
| 4                                    | 13,473 | 15.4 | 13,846 | 15.9 | 13,831 | 15.8 | 13,829 | 15.8 | 13,812 | 15.8 | 13,813 | 15.8 |
| 5 (most dependent)                   | 12,103 | 13.9 | 12,480 | 14.3 | 12,487 | 14.3 | 12,446 | 14.2 | 12,480 | 14.3 | 12,460 | 14.3 |
| Missing                              | 1,823  | 2.1  | -      | -    | -      | -    | -      | -    | -      | -    | -      | -    |
| <b>Ethnic concentration quintile</b> |        |      |        |      |        |      |        |      |        |      |        |      |
| 1 (lowest concentration)             | 12,521 | 14.3 | 13,069 | 15.0 | 13,077 | 15.0 | 13,051 | 14.9 | 13,057 | 14.9 | 13,042 | 14.9 |
| 2                                    | 13,661 | 15.6 | 14,016 | 16.0 | 14,014 | 16.0 | 14,011 | 16.0 | 14,009 | 16.0 | 14,018 | 16.0 |
| 3                                    | 14,672 | 16.8 | 14,972 | 17.1 | 14,966 | 17.1 | 14,976 | 17.1 | 14,988 | 17.2 | 14,982 | 17.2 |
| 4                                    | 17,894 | 20.5 | 18,194 | 20.8 | 18,198 | 20.8 | 18,190 | 20.8 | 18,201 | 20.8 | 18,202 | 20.8 |
| 5 (highest concentration)            | 26,805 | 30.7 | 27,125 | 31.0 | 27,121 | 31.0 | 27,148 | 31.1 | 27,121 | 31.0 | 27,132 | 31.1 |
| Missing                              | 1,823  | 2.1  | -      | -    | -      | -    | -      | -    | -      | -    | -      | -    |

Abbreviations: BMI, body mass index; IQR, inter-quartile range.

<sup>a</sup> Column percentages.

<sup>b</sup> Exclusive breastfeeding was compared against a composite of newborn feeding from birth to discharge from hospital/birth center containing responses for: breast milk substitute (formula only), breast milk substitute (other), combination of breastmilk and breastmilk substitute, and unknown feeding practices.

<sup>c</sup> Self-reported cannabis, opioid or alcohol use during pregnancy.

**Table S3. Source population and study population by month of delivery**

| Month of delivery | Source population                                       |                                                                             |             | Study population                                       |             |
|-------------------|---------------------------------------------------------|-----------------------------------------------------------------------------|-------------|--------------------------------------------------------|-------------|
|                   | Total number of individuals who gave birth <sup>a</sup> | Received $\geq 1$ dose of COVID-19 vaccine by end of pregnancy <sup>b</sup> |             | Remained unvaccinated by end of pregnancy <sup>c</sup> |             |
|                   |                                                         | Number                                                                      | %           | Number                                                 | %           |
| January 2021      | 10,091                                                  | 10                                                                          | 0.1         | 10,081                                                 | 99.9        |
| February 2021     | 10,187                                                  | 33                                                                          | 0.3         | 10,154                                                 | 99.7        |
| March 2021        | 11,889                                                  | 178                                                                         | 1.5         | 11,711                                                 | 98.5        |
| April 2021        | 11,080                                                  | 636                                                                         | 5.7         | 10,444                                                 | 94.3        |
| May 2021          | 11,727                                                  | 4,288                                                                       | 36.6        | 7,439                                                  | 63.4        |
| June 2021         | 12,389                                                  | 5,691                                                                       | 45.9        | 6,698                                                  | 54.1        |
| July 2021         | 12,575                                                  | 6,240                                                                       | 49.6        | 6,335                                                  | 50.4        |
| August 2021       | 12,368                                                  | 6,251                                                                       | 50.5        | 6,117                                                  | 49.5        |
| September 2021    | 11,946                                                  | 6,450                                                                       | 54.0        | 5,496                                                  | 46.0        |
| October 2021      | 11,569                                                  | 6,652                                                                       | 57.5        | 4,917                                                  | 42.5        |
| November 2021     | 10,873                                                  | 6,680                                                                       | 61.4        | 4,193                                                  | 38.6        |
| December 2021     | 10,504                                                  | 6,713                                                                       | 63.9        | 3,791                                                  | 36.1        |
| <b>OVERALL</b>    | <b>137,198</b>                                          | <b>49,822</b>                                                               | <b>36.3</b> | <b>87,376</b>                                          | <b>63.7</b> |

<sup>a</sup> Total number of deliveries, by month, after exclusion criteria were applied (see Figure 1 for study flow diagram).

<sup>b</sup> Number and proportion of individuals who had received  $\geq 1$  dose of COVID-19 vaccine (before or during pregnancy) by the time of delivery, by month.

<sup>c</sup> Number and proportion of individuals who had not received any doses of COVID-19 vaccine by the time of delivery (before or during pregnancy, including the date of delivery), by month. This is the study population.



**Figure S1. Change in selected characteristics of the study population by month of delivery**

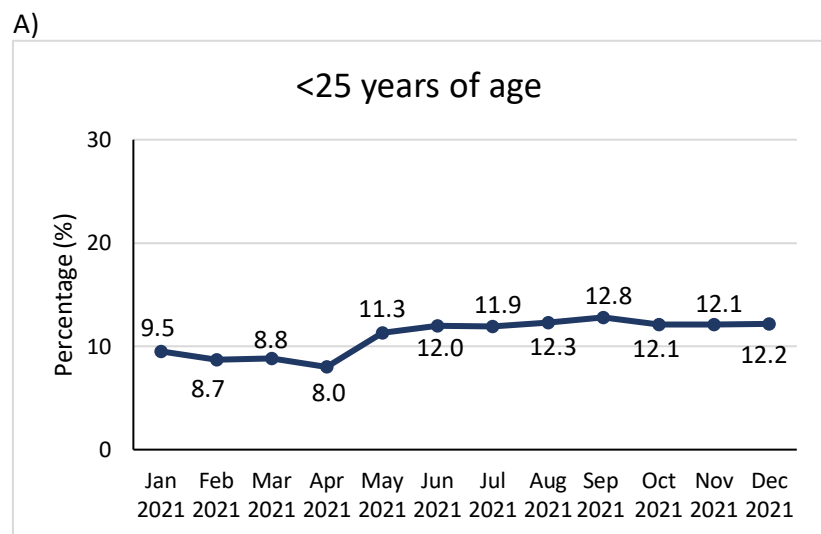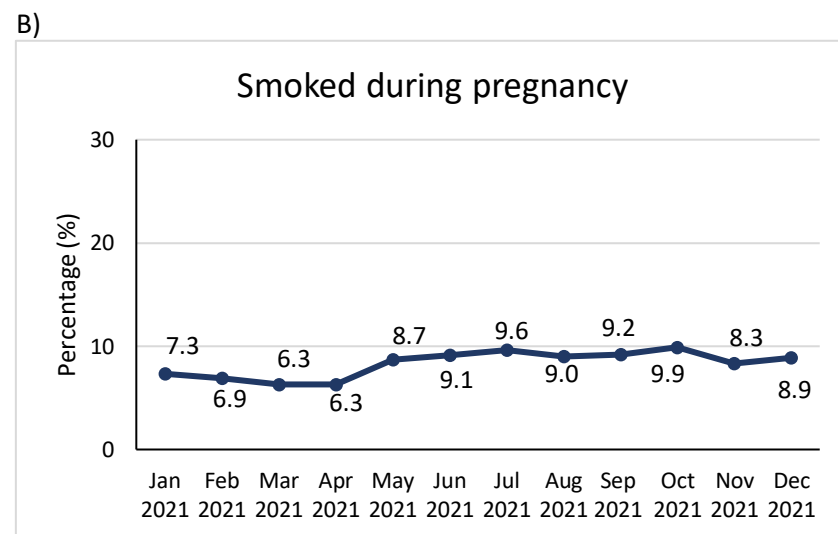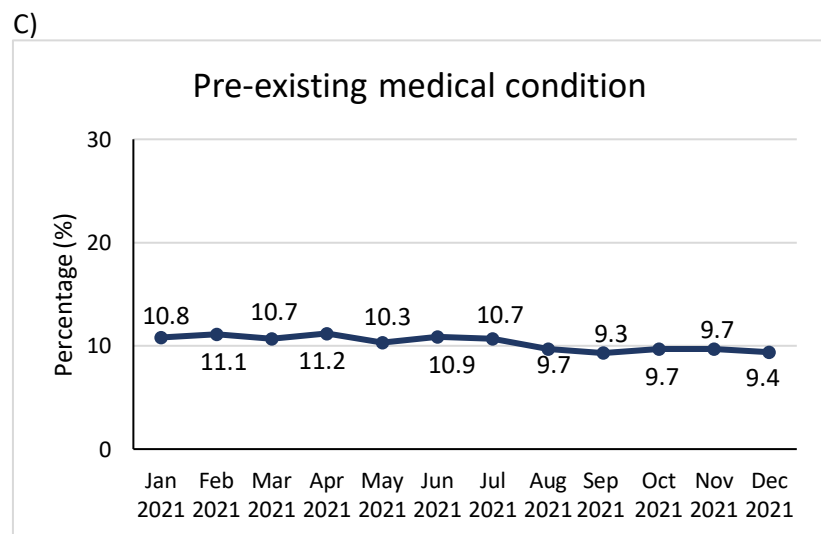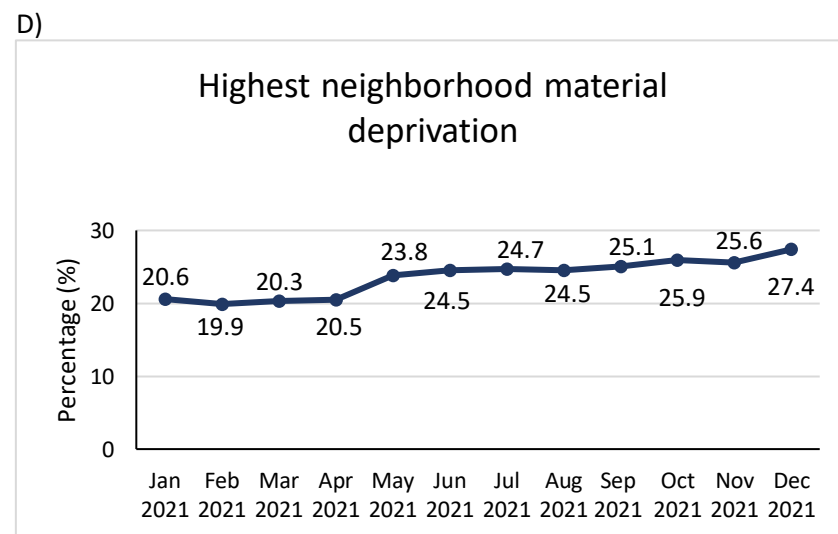

E)

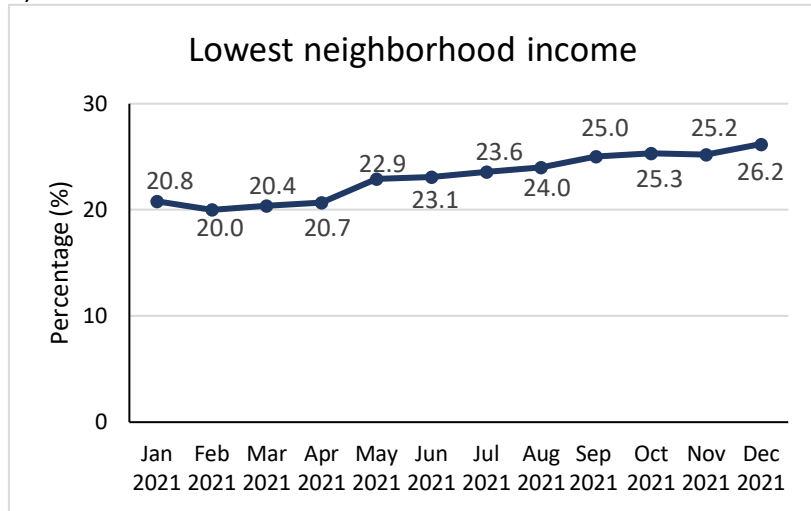

F)

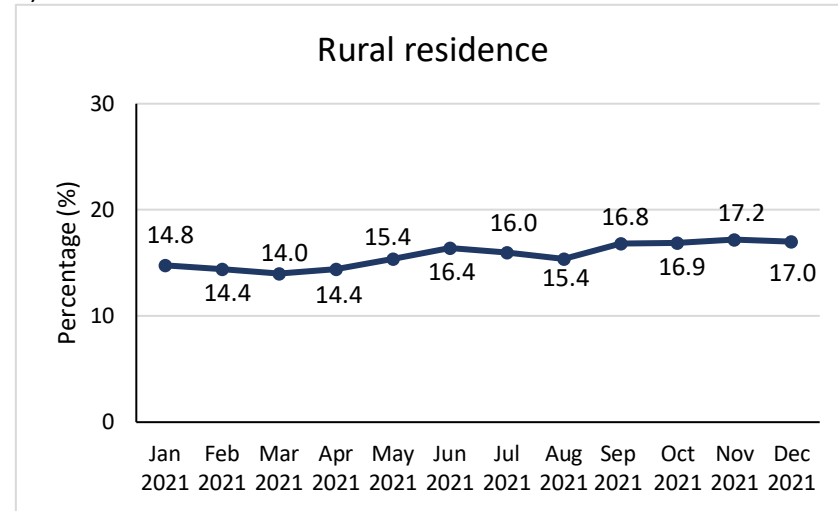

G)

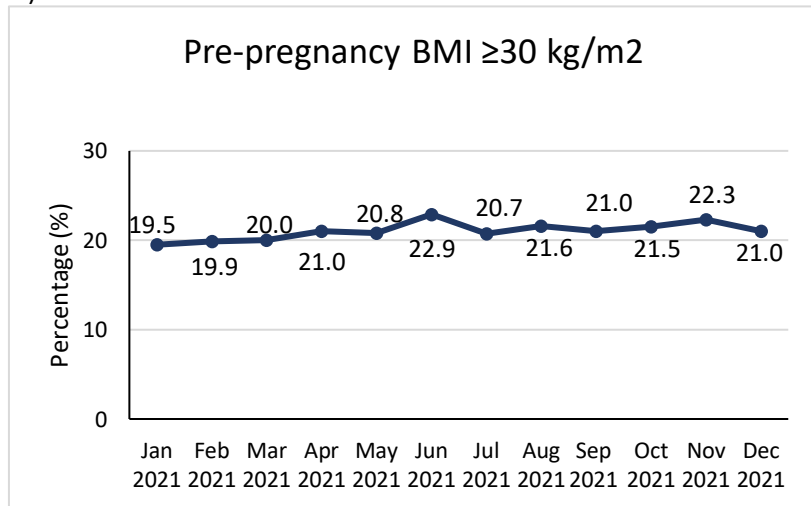

H)

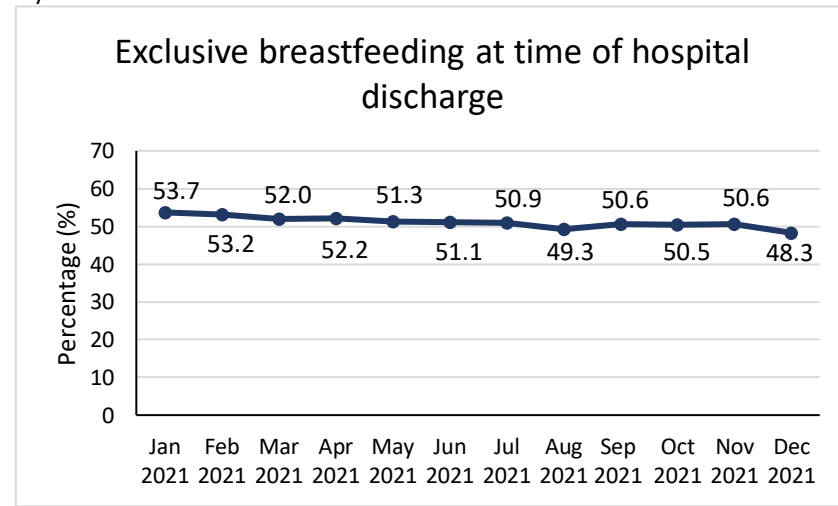

**Figure S2. Cumulative incidence plots of time-to-COVID-19 vaccine series initiation after pregnancy, by calendar month of delivery and maternal age group**

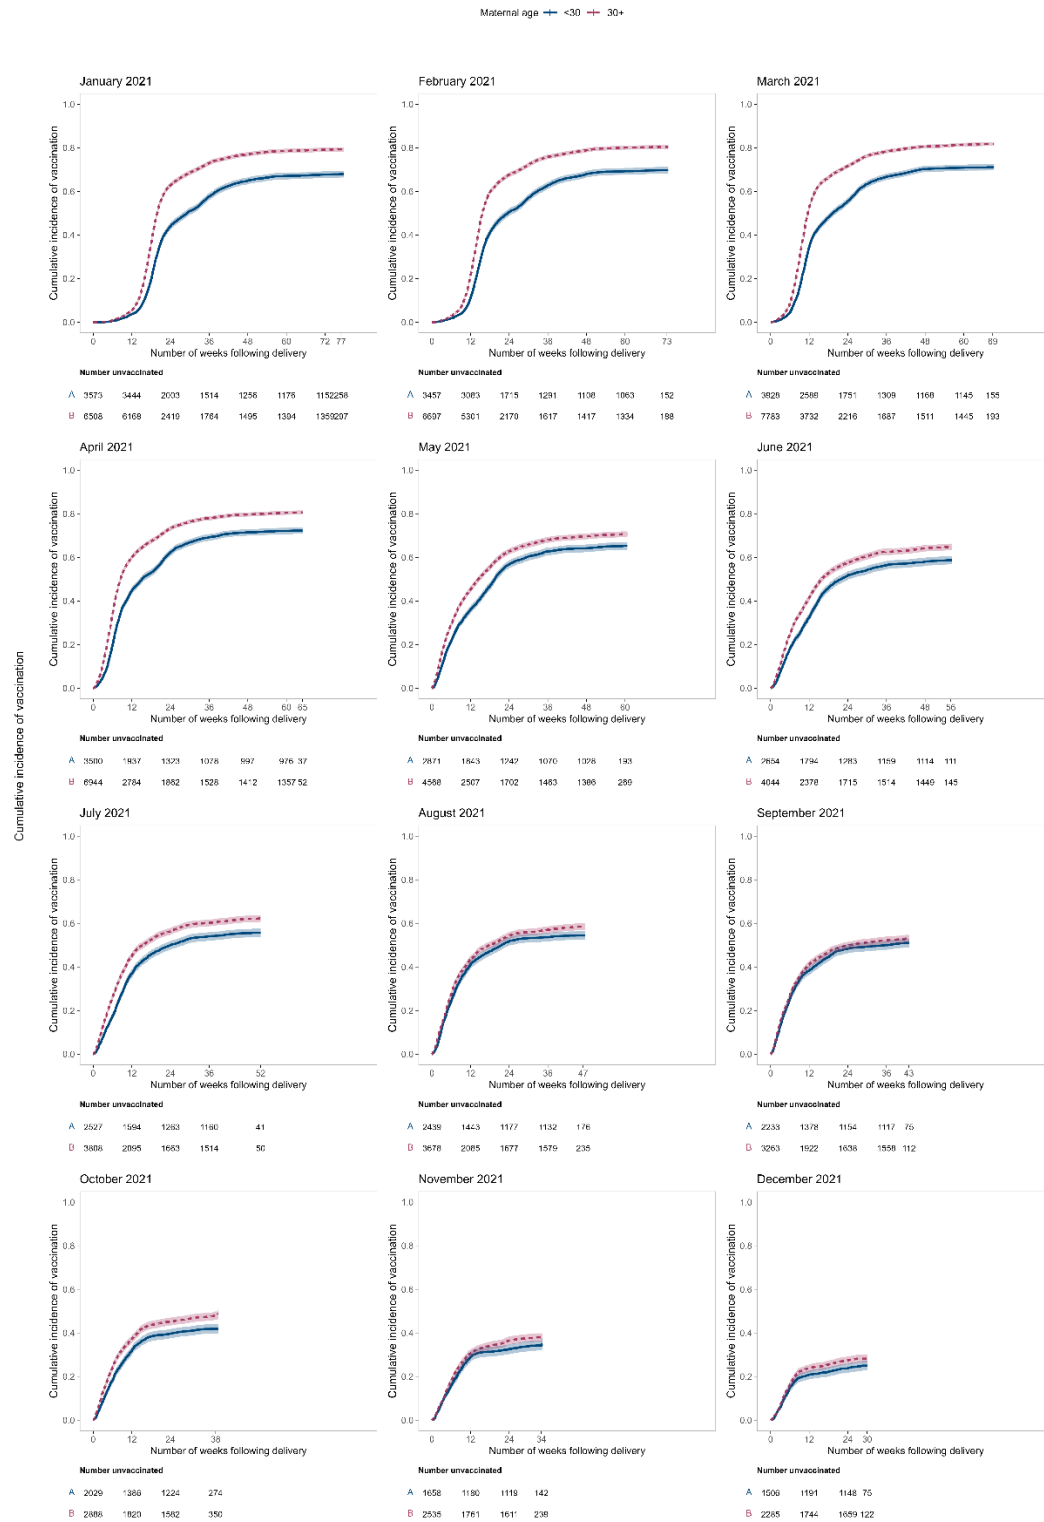

**Table S4. Cumulative incidence of COVID-19 vaccine series initiation by 6 months (24 weeks) after pregnancy, by 12 months (48 weeks) after pregnancy, and by end of follow-up (June 30, 2022), stratified by calendar month of delivery**

| Month of delivery | Cumulative incidence (%) of COVID-19 vaccine series initiation by 6 months (24 weeks) after pregnancy | Cumulative incidence (%) of COVID-19 vaccine series initiation by 12 months (48 weeks) after pregnancy <sup>a</sup> | Cumulative incidence (%) of COVID-19 vaccine series initiation by the end of follow-up (June 30, 2022) <sup>b</sup> |
|-------------------|-------------------------------------------------------------------------------------------------------|---------------------------------------------------------------------------------------------------------------------|---------------------------------------------------------------------------------------------------------------------|
| January 2021      | 56.3                                                                                                  | 72.8                                                                                                                | 75.2                                                                                                                |
| February 2021     | 61.8                                                                                                  | 75.2                                                                                                                | 76.8                                                                                                                |
| March 2021        | 66.3                                                                                                  | 77.1                                                                                                                | 78.1                                                                                                                |
| April 2021        | 69.6                                                                                                  | 76.9                                                                                                                | 77.8                                                                                                                |
| May 2021          | 60.5                                                                                                  | 67.6                                                                                                                | 68.5                                                                                                                |
| June 2021         | 55.3                                                                                                  | 61.8                                                                                                                | 62.3                                                                                                                |
| July 2021         | 53.9                                                                                                  | 59.5                                                                                                                | 59.5                                                                                                                |
| August 2021       | 53.4                                                                                                  | ---                                                                                                                 | 56.8                                                                                                                |
| September 2021    | 49.2                                                                                                  | ---                                                                                                                 | 52.0                                                                                                                |
| October 2021      | 43.0                                                                                                  | ---                                                                                                                 | 45.3                                                                                                                |
| November 2021     | 35.0                                                                                                  | ---                                                                                                                 | 36.4                                                                                                                |
| December 2021     | 26.0                                                                                                  | ---                                                                                                                 | 26.8                                                                                                                |
| OVERALL           | 56.3                                                                                                  | ---                                                                                                                 | 65.0                                                                                                                |

<sup>a</sup> July to December 2021 not shown, as individuals who have birth in these calendar months had less than 12 months of follow-up time.

<sup>b</sup> Follow-up time ranged from 6 to 18 months according to calendar month of delivery.

**Table S5. Cumulative incidence of COVID-19 vaccine series initiation by 6 months (24 weeks) after pregnancy, stratified by calendar month of delivery, maternal age group, and newborn feeding status from birth to discharge from hospital or birth center <sup>a</sup>**

| Month of delivery | Overall | Maternal age group |           | Newborn feeding status from birth to discharge from hospital or birth center <sup>b</sup> |                                  |
|-------------------|---------|--------------------|-----------|-------------------------------------------------------------------------------------------|----------------------------------|
|                   |         | <30 years          | ≥30 years | Exclusive breastfeeding                                                                   | Other methods of newborn feeding |
| January 2021      | 56.3    | 44.1               | 63.0      | 55.8                                                                                      | 56.7                             |
| February 2021     | 61.8    | 50.5               | 67.7      | 61.4                                                                                      | 62.2                             |
| March 2021        | 66.3    | 55.7               | 71.7      | 66.0                                                                                      | 66.5                             |
| April 2021        | 69.6    | 62.4               | 73.3      | 69.5                                                                                      | 69.7                             |
| May 2021          | 60.5    | 56.8               | 62.9      | 58.8                                                                                      | 61.9                             |
| June 2021         | 55.3    | 51.8               | 57.6      | 53.3                                                                                      | 56.9                             |
| July 2021         | 53.9    | 50.1               | 56.4      | 50.5                                                                                      | 56.5                             |
| August 2021       | 53.4    | 51.8               | 54.5      | 51.3                                                                                      | 54.9                             |
| September 2021    | 49.2    | 48.4               | 49.8      | 46.8                                                                                      | 51.1                             |
| October 2021      | 43.0    | 39.7               | 45.3      | 39.7                                                                                      | 45.4                             |
| November 2021     | 35.0    | 32.6               | 36.5      | 32.4                                                                                      | 36.9                             |
| December 2021     | 26.0    | 23.9               | 27.4      | 24.4                                                                                      | 27.1                             |
| OVERALL           | 56.3    | 49.5               | 60.2      | 55.1                                                                                      | 57.2                             |

<sup>a</sup> Follow-up time limited to 6 months (24 weeks) after delivery.

<sup>b</sup> Exclusive breastfeeding vs. other methods of newborn feeding from birth to discharge from hospital/birth center. Other methods of feeding comprised: breast milk substitute (formula only), breast milk substitute (other), combination of breastmilk and breastmilk substitute, and unknown feeding practices.

**Figure S3. Cumulative incidence plots of time-to-COVID-19 vaccine series initiation after pregnancy, by calendar month of delivery and newborn feeding status at discharge from hospital/birth center**

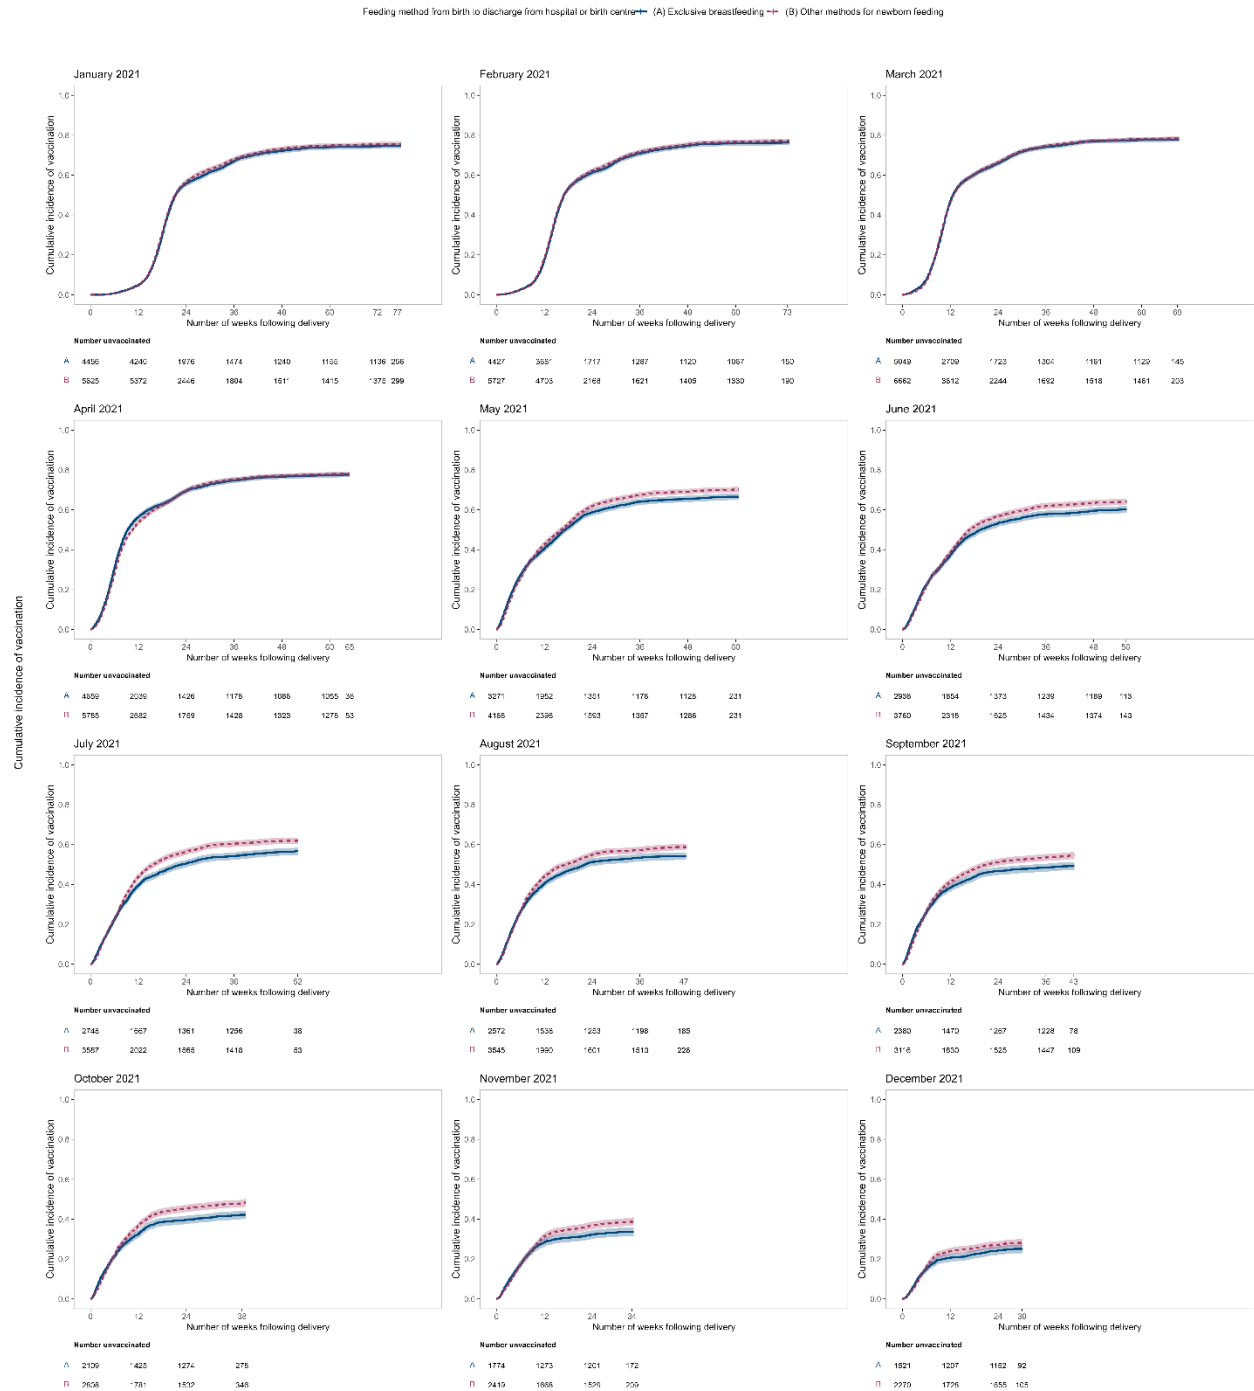

**Table S6. COVID-19 vaccine series initiation after pregnancy among individuals who gave birth between May 1 and December 31, 2021 and had not yet been vaccinated by the end of pregnancy, stratified by timing of delivery**

| Characteristic                                       | Adjusted Hazard Ratio (95% CI)               |                                                      |
|------------------------------------------------------|----------------------------------------------|------------------------------------------------------|
|                                                      | Births between May 1, 2021 - August 31, 2021 | Births between September 1, 2021 - December 31, 2021 |
| <b>Maternal age (years)</b>                          |                                              |                                                      |
| <25                                                  | 0.72 (0.68, 0.76)                            | 0.75 (0.69, 0.81)                                    |
| 25-29                                                | 0.91 (0.88, 0.95)                            | 0.94 (0.89, 1.00)                                    |
| 30-34                                                | 1.00                                         | 1.00                                                 |
| 35-39                                                | 0.98 (0.94, 1.02)                            | 0.93 (0.88, 0.99)                                    |
| ≥40                                                  | 0.84 (0.78, 0.91)                            | 0.69 (0.62, 0.78)                                    |
| <b>Parity</b>                                        |                                              |                                                      |
| 0 (Nulliparous)                                      | 1.05 (1.02, 1.09)                            | 1.09 (1.04, 1.15)                                    |
| 1 (Primiparous)                                      | 1.00                                         | 1.00                                                 |
| ≥2 (Multiparous)                                     | 0.73 (0.70, 0.76)                            | 0.69 (0.65, 0.73)                                    |
| <b>Multiple birth</b>                                |                                              |                                                      |
| Yes                                                  | 0.99 (0.87, 1.12)                            | 1.06 (0.88, 1.26)                                    |
| <b>Any pre-existing maternal medical condition</b>   |                                              |                                                      |
| Yes                                                  | 1.06 (1.01, 1.11)                            | 1.13 (1.05, 1.22)                                    |
| <b>Exclusive breastfeeding at discharge</b>          |                                              |                                                      |
| Yes                                                  | 0.82 (0.79, 0.84)                            | 0.79 (0.75, 0.83)                                    |
| <b>Healthcare provider who caught/delivered baby</b> |                                              |                                                      |
| Midwife                                              | 0.70 (0.67, 0.74)                            | 0.63 (0.58, 0.68)                                    |
| Registered Nurse or CNS/NP                           | 0.85 (0.72, 1.01)                            | 0.93 (0.72, 1.19)                                    |
| Family Physician                                     | 0.83 (0.77, 0.89)                            | 0.94 (0.85, 1.04)                                    |
| Obstetrician                                         | 1.00                                         | 1.00                                                 |
| Other                                                | 0.98 (0.93, 1.04)                            | 1.00 (0.92, 1.09)                                    |
| Unattended (None)                                    | 0.51 (0.38, 0.69)                            | 0.50 (0.31, 0.80)                                    |
| <b>Smoked during pregnancy</b>                       |                                              |                                                      |
| Yes                                                  | 0.69 (0.64, 0.73)                            | 0.65 (0.60, 0.72)                                    |
| <b>Substance use during pregnancy</b>                |                                              |                                                      |
| Yes                                                  | 0.67 (0.63, 0.72)                            | 0.65 (0.58, 0.72)                                    |
| <b>Pregnancy complications</b>                       |                                              |                                                      |
| Yes                                                  | 1.12 (1.08, 1.15)                            | 1.11 (1.06, 1.16)                                    |
| <b>Preterm birth</b>                                 |                                              |                                                      |
| Yes (<37 Weeks)                                      | 0.92 (0.87, 0.98)                            | 0.90 (0.82, 0.99)                                    |
| <b>Maternal BMI (kg/m<sup>2</sup>)</b>               |                                              |                                                      |
| ≥30.0 (Obese)                                        | 1.03 (0.99, 1.07)                            | 1.04 (0.98, 1.11)                                    |
| <b>Neighbourhood median family income quintile</b>   |                                              |                                                      |
| 1 (Lowest)                                           | 0.79 (0.75, 0.84)                            | 0.81 (0.75, 0.88)                                    |
| 2                                                    | 0.88 (0.83, 0.92)                            | 0.90 (0.83, 0.97)                                    |
| 3                                                    | 0.95 (0.90, 1.00)                            | 0.95 (0.87, 1.02)                                    |
| 4                                                    | 1.00 (0.95, 1.05)                            | 0.99 (0.91, 1.07)                                    |
| 5 (Highest)                                          | 1.00                                         | 1.00                                                 |
| <b>Rural residence</b>                               |                                              |                                                      |
| Yes                                                  | 0.73 (0.69, 0.76)                            | 0.71 (0.66, 0.76)                                    |

**Table S6. COVID-19 vaccine series initiation after pregnancy among individuals who gave birth between May 1 and December 31, 2021 and had not yet been vaccinated by the end of pregnancy, stratified by timing of delivery (continued)**

| Characteristic                          | Adjusted Hazard Ratio (95% CI)               |                                                      |
|-----------------------------------------|----------------------------------------------|------------------------------------------------------|
|                                         | Births between May 1, 2021 - August 31, 2021 | Births between September 1, 2021 - December 31, 2021 |
| <b>PHU region of residence</b>          |                                              |                                                      |
| South West                              | 1.00 (0.94, 1.06)                            | 0.91 (0.83, 1.00)                                    |
| Central West                            | 1.01 (0.96, 1.07)                            | 1.03 (0.96, 1.11)                                    |
| Central East                            | 1.06 (1.01, 1.11)                            | 1.09 (1.02, 1.17)                                    |
| Greater Toronto Area                    | 1.00                                         | 1.00                                                 |
| Eastern                                 | 1.00 (0.94, 1.06)                            | 1.09 (1.00, 1.19)                                    |
| North West                              | 1.24 (1.10, 1.39)                            | 1.23 (1.03, 1.47)                                    |
| North East                              | 1.01 (0.92, 1.11)                            | 1.04 (0.91, 1.18)                                    |
| <b>Marginalization Indices</b>          |                                              |                                                      |
| <b>Residential instability quintile</b> |                                              |                                                      |
| 1 (Least unstable)                      | 1.00                                         | 1.00                                                 |
| 2                                       | 1.02 (0.97, 1.07)                            | 1.06 (0.98, 1.14)                                    |
| 3                                       | 0.98 (0.94, 1.03)                            | 0.98 (0.91, 1.06)                                    |
| 4                                       | 0.99 (0.93, 1.05)                            | 0.93 (0.85, 1.01)                                    |
| 5 (Most unstable)                       | 1.03 (0.96, 1.09)                            | 1.00 (0.92, 1.10)                                    |
| <b>Material deprivation quintile</b>    |                                              |                                                      |
| 1 (Least deprived)                      | 1.00                                         | 1.00                                                 |
| 2                                       | 0.93 (0.88, 0.97)                            | 0.89 (0.83, 0.96)                                    |
| 3                                       | 0.89 (0.84, 0.94)                            | 0.86 (0.79, 0.93)                                    |
| 4                                       | 0.84 (0.79, 0.90)                            | 0.79 (0.72, 0.87)                                    |
| 5 (Most deprived)                       | 0.77 (0.72, 0.83)                            | 0.70 (0.63, 0.77)                                    |
| <b>Dependency quintile</b>              |                                              |                                                      |
| 1 (Least dependent)                     | 1.00                                         | 1.00                                                 |
| 2                                       | 0.95 (0.91, 0.99)                            | 0.91 (0.86, 0.98)                                    |
| 3                                       | 0.89 (0.85, 0.94)                            | 0.89 (0.83, 0.96)                                    |
| 4                                       | 0.94 (0.90, 0.99)                            | 0.90 (0.83, 0.96)                                    |
| 5 (Most dependent)                      | 0.91 (0.86, 0.96)                            | 0.84 (0.78, 0.91)                                    |
| <b>Ethnic concentration quintile</b>    |                                              |                                                      |
| 1 (Lowest concentration)                | 1.00                                         | 1.00                                                 |
| 2                                       | 0.98 (0.93, 1.04)                            | 1.13 (1.04, 1.24)                                    |
| 3                                       | 1.03 (0.96, 1.09)                            | 1.16 (1.05, 1.27)                                    |
| 4                                       | 1.07 (1.00, 1.13)                            | 1.20 (1.09, 1.32)                                    |
| 5 (Highest concentration)               | 1.22 (1.14, 1.29)                            | 1.47 (1.34, 1.62)                                    |



**Table S7. COVID-19 vaccine series initiation after pregnancy among individuals who gave birth between May 1 and December 31, 2021 and had not yet been vaccinated by the end of pregnancy, limiting the follow-up period to 6 months (24 weeks)**

| Characteristic                                                                                    | Received $\geq 1$ dose of COVID-19 vaccine within 180 days following delivery <sup>a</sup> |                                             |
|---------------------------------------------------------------------------------------------------|--------------------------------------------------------------------------------------------|---------------------------------------------|
|                                                                                                   | Unadjusted hazard ratio (95% CI)                                                           | Adjusted hazard ratio <sup>d</sup> (95% CI) |
| <b>Maternal age (years)</b>                                                                       |                                                                                            |                                             |
| <25                                                                                               | 0.69 (0.65 to 0.72)                                                                        | 0.72 (0.69 to 0.76)                         |
| 25-29                                                                                             | 0.89 (0.86 to 0.92)                                                                        | 0.91 (0.89 to 0.95)                         |
| 30-34                                                                                             | 1.00                                                                                       | 1.00                                        |
| 35-39                                                                                             | 0.95 (0.92 to 0.99)                                                                        | 0.95 (0.91 to 0.98)                         |
| $\geq 40$                                                                                         | 0.78 (0.73 to 0.83)                                                                        | 0.77 (0.72 to 0.83)                         |
| <b>Month of delivery</b>                                                                          |                                                                                            |                                             |
| May 2021                                                                                          | 1.00                                                                                       | 1.00                                        |
| June 2021                                                                                         | 0.87 (0.83 to 0.90)                                                                        | 0.87 (0.83 to 0.91)                         |
| July 2021                                                                                         | 0.86 (0.82 to 0.90)                                                                        | 0.87 (0.83 to 0.90)                         |
| August 2021                                                                                       | 0.86 (0.83 to 0.90)                                                                        | 0.87 (0.83 to 0.91)                         |
| September 2021                                                                                    | 0.78 (0.75 to 0.82)                                                                        | 0.79 (0.76 to 0.83)                         |
| October 2021                                                                                      | 0.65 (0.61 to 0.68)                                                                        | 0.65 (0.62 to 0.69)                         |
| November 2021                                                                                     | 0.49 (0.47 to 0.52)                                                                        | 0.50 (0.47 to 0.53)                         |
| December 2021                                                                                     | 0.35 (0.33 to 0.38)                                                                        | 0.35 (0.33 to 0.38)                         |
| <b>Parity</b>                                                                                     |                                                                                            |                                             |
| 0 (nulliparous)                                                                                   | 1.04 (1.01 to 1.07)                                                                        | 1.07 (1.04 to 1.10)                         |
| 1 (primiparous)                                                                                   | 1.00                                                                                       | 1.00                                        |
| $\geq 2$ (multiparous)                                                                            | 0.71 (0.68 to 0.73)                                                                        | 0.70 (0.68 to 0.73)                         |
| <b>Multiple birth</b>                                                                             |                                                                                            |                                             |
| No                                                                                                | 1.00                                                                                       | 1.00                                        |
| Yes                                                                                               | 1.01 (0.91 to 1.13)                                                                        | 1.01 (0.90 to 1.12)                         |
| <b>Any pre-existing maternal medical condition <sup>e</sup></b>                                   |                                                                                            |                                             |
| No                                                                                                | 1.00                                                                                       | 1.00                                        |
| Yes                                                                                               | 1.11 (1.07 to 1.16)                                                                        | 1.09 (1.05 to 1.14)                         |
| <b>Exclusive breastfeeding from birth to discharge from hospital or birth center <sup>f</sup></b> |                                                                                            |                                             |
| No                                                                                                | 1.00                                                                                       | 1.00                                        |
| Yes                                                                                               | 0.81 (0.79 to 0.83)                                                                        | 0.81 (0.79 to 0.84)                         |
| <b>Healthcare provider who caught/delivered baby</b>                                              |                                                                                            |                                             |
| Midwife                                                                                           | 0.65 (0.63 to 0.68)                                                                        | 0.68 (0.65 to 0.71)                         |
| Registered Nurse or CNS/NP                                                                        | 0.84 (0.73 to 0.98)                                                                        | 0.87 (0.76 to 1.01)                         |
| Family Physician                                                                                  | 0.84 (0.79 to 0.89)                                                                        | 0.88 (0.83 to 0.94)                         |
| Obstetrician                                                                                      | 1.00                                                                                       | 1.00                                        |
| Other                                                                                             | 0.95 (0.91 to 1.00)                                                                        | 0.99 (0.94 to 1.04)                         |

|                                             |                     |                     |
|---------------------------------------------|---------------------|---------------------|
| Unattended (None)                           | 0.44 (0.34 to 0.58) | 0.47 (0.36 to 0.62) |
| Smoked during pregnancy                     |                     |                     |
| No                                          | 1.00                | 1.00                |
| Yes                                         | 0.64 (0.60 to 0.67) | 0.67 (0.63 to 0.70) |
| Substance use during pregnancy <sup>g</sup> |                     |                     |
| No                                          | 1.00                | 1.00                |
| Yes                                         | 0.63 (0.59 to 0.67) | 0.66 (0.62 to 0.70) |
| Pregnancy complications <sup>h</sup>        |                     |                     |
| No                                          | 1.00                | 1.00                |
| Yes                                         | 1.20 (1.16 to 1.24) | 1.18 (1.14 to 1.23) |
| Preterm birth                               |                     |                     |
| No ( $\geq 37$ weeks)                       | 1.00                | 1.00                |
| Yes (<37 Weeks)                             | 0.93 (0.88 to 0.98) | 0.93 (0.88 to 0.98) |
| Maternal BMI (kg/m <sup>2</sup> )           |                     |                     |
| $\geq 30.0$                                 | 1.02 (0.99 to 1.05) | 1.04 (1.00 to 1.07) |
| <30.0                                       | 1.00                | 1.00                |
| Neighborhood median family income quintiles |                     |                     |
| 1 (Lowest)                                  | 0.80 (0.76 to 0.84) | 0.78 (0.75 to 0.82) |
| 2                                           | 0.88 (0.85 to 0.93) | 0.87 (0.84 to 0.91) |
| 3                                           | 0.95 (0.91 to 0.99) | 0.93 (0.89 to 0.98) |
| 4                                           | 1.00 (0.95 to 1.04) | 0.99 (0.94 to 1.03) |
| 5 (Highest)                                 | 1.00                | 1.00                |
| Rural residence                             |                     |                     |
| No                                          | 1.00                | 1.00                |
| Yes                                         | 0.74 (0.71 to 0.77) | 0.72 (0.69 to 0.75) |
| PHU region of residence                     |                     |                     |
| South West                                  | 0.93 (0.89 to 0.98) | 1.00 (0.95 to 1.05) |
| Central West                                | 1.04 (1.00 to 1.08) | 1.04 (1.00 to 1.09) |
| Central East                                | 1.14 (1.10 to 1.19) | 1.10 (1.05 to 1.14) |
| Greater Toronto Area                        | 1.00                | 1.00                |
| Eastern                                     | 1.01 (0.96 to 1.06) | 1.05 (1.00 to 1.11) |
| North West                                  | 1.11 (1.01 to 1.23) | 1.24 (1.12 to 1.38) |
| North East                                  | 0.94 (0.87 to 1.01) | 1.06 (0.98 to 1.14) |
| Marginalization indices <sup>i</sup>        |                     |                     |
| Residential instability quintile            |                     |                     |
| 1 (least unstable)                          | 1.00                | 1.00                |
| 2                                           | 0.98 (0.94 to 1.03) | 1.02 (0.98 to 1.06) |
| 3                                           | 0.92 (0.88 to 0.96) | 0.97 (0.93 to 1.01) |
| 4                                           | 0.88 (0.84 to 0.92) | 0.96 (0.92 to 1.01) |
| 5 (most unstable)                           | 0.89 (0.85 to 0.92) | 1.02 (0.96 to 1.07) |
| Material deprivation quintile               |                     |                     |
| 1 (least deprived)                          | 1.00                | 1.00                |
| 2                                           | 0.91 (0.87 to 0.95) | 0.91 (0.87 to 0.95) |
| 3                                           | 0.87 (0.84 to 0.91) | 0.88 (0.84 to 0.92) |
| 4                                           | 0.81 (0.78 to 0.85) | 0.82 (0.77 to 0.86) |

|                               |                     |                     |
|-------------------------------|---------------------|---------------------|
| 5 (most deprived)             | 0.72 (0.69 to 0.75) | 0.73 (0.69 to 0.78) |
| Dependency quintile           |                     |                     |
| 1 (least dependent)           | 1.00                | 1.00                |
| 2                             | 0.90 (0.86 to 0.93) | 0.94 (0.91 to 0.98) |
| 3                             | 0.85 (0.81 to 0.88) | 0.90 (0.86 to 0.93) |
| 4                             | 0.87 (0.83 to 0.90) | 0.93 (0.89 to 0.97) |
| 5 (most dependent)            | 0.82 (0.78 to 0.85) | 0.90 (0.86 to 0.94) |
| Ethnic concentration quintile |                     |                     |
| 1 (lowest concentration)      | 1.00                | 1.00                |
| 2                             | 1.10 (1.05 to 1.16) | 1.04 (0.99 to 1.09) |
| 3                             | 1.17 (1.11 to 1.23) | 1.07 (1.01 to 1.13) |
| 4                             | 1.22 (1.16 to 1.28) | 1.10 (1.04 to 1.16) |
| 5 (highest concentration)     | 1.32 (1.27 to 1.38) | 1.28 (1.21 to 1.35) |

Abbreviations: BMI, body mass index; PHU, public health unit

<sup>a</sup> Follow-up period extended from the day of delivery until June 30, 2022.

<sup>b</sup> Column percentages.

<sup>c</sup> Row percentages.

<sup>d</sup> Models were adjusted for maternal age at delivery, neighborhood income quintile, rural residence, and public health unit region.

<sup>e</sup> Composite of: asthma, chronic hypertension, diabetes, heart disease, thyroid disease.

<sup>f</sup> Exclusive breastfeeding vs. other methods of newborn feeding from birth to discharge from hospital or birth center. Other methods of feeding comprised: breast milk substitute (formula only), breast milk substitute (other), combination of breastmilk and breastmilk substitute, and unknown feeding practices.

<sup>g</sup> Self-reported cannabis, opioid or alcohol use during pregnancy.

<sup>h</sup> Composite of: gestational hypertension, eclampsia, pre-eclampsia, gestational diabetes, and pulmonary embolism.

<sup>i</sup> Ontario Marginalization Index included neighborhood-level quintiles for residential instability (family or housing instability), material deprivation (inability to attain basic material needs), dependency (receipt of income support), and ethnic concentration (geographic areas with high concentrations of recent immigrants and/or 'visible minorities'; see Table S1 for details.

**Figure S4. Lexis diagram showing first COVID-19 vaccine dose administered within the first 6 months (24 weeks) after pregnancy, by calendar month of delivery (x-axis) and time since delivery in days (y-axis) <sup>a</sup>**

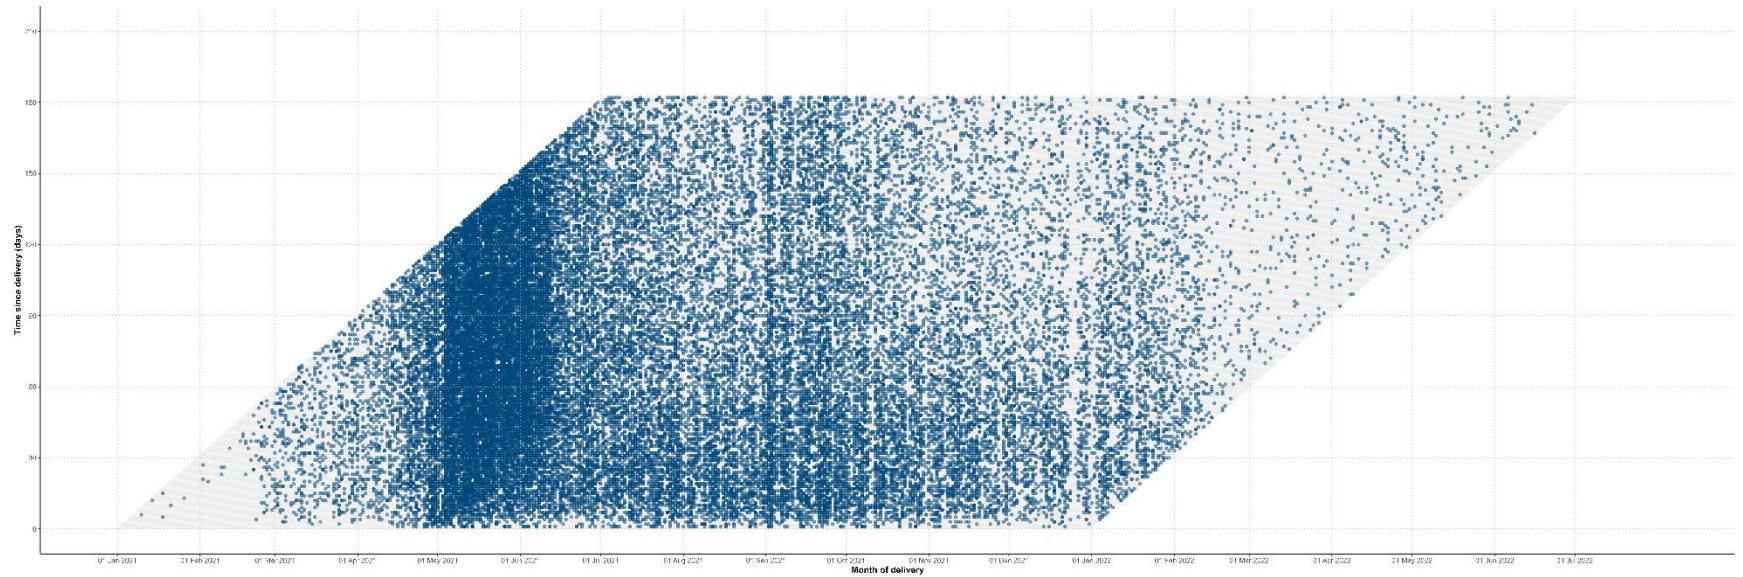

<sup>a</sup> Among the full study population of deliveries from January 1 to December 31, 2021.

## References

1. Association of Ontario Midwives. Birthplace Options - Why Give Birth at Home? <https://www.ontariomidwives.ca/home-birth>; [Accessed 20 September, 2022].
2. Murphy MSQ, Fell DB, Sprague AE, Corsi DJ, Dougan S, Dunn SI, et al. Data Resource Profile: Better Outcomes Registry & Network (BORN) Ontario. *Int J Epidemiol* 2021;50:1416–25. <https://doi.org/10.1093/ije/dyab033>.
3. Huang T, Dougan S, Walker M, Armour CM, Okun N. Trends in the use of prenatal testing services for fetal aneuploidy in Ontario: a descriptive study. *CMAJ Open* 2018;6:E436-44. <https://doi.org/10.9778/cmajo.20180046>.
4. Public Health Ontario. Ontario Marginalization Index (ON-Marg). <https://www.publichealthontario.ca/en/data-and-analysis/health-equity/ontario-marginalization-index>; [Accessed 20 September, 2022].
